# Supplementary material for: In situ synthesis of thermo-responsive ABC triblock terpolymer nano-objects by seeded RAFT polymerization
Source: Royal Society of Chemistry journal article supplement (doi:10.1039/c4py00510d), 2014-01-01
Supplement: c4py00510d1.pdf [file c4py00510d1.pdf]

**In situ synthesis of thermo-responsive ABC triblock terpolymer nano-objects by  
seeded RAFT polymerization**

Yaqing Qu, Fei Huo, Quanlong Li, Xin He, Shentong Li, and Wangqing Zhang\*

Key Laboratory of Functional Polymer Materials of the Ministry of Education,  
Collaborative Innovation Center of Chemical Science and Engineering (Tianjin),  
Institute of Polymer Chemistry, Nankai University, Tianjin 300071, China.

\*To whom correspondence should be addressed. E-mail: wqzhang@nankai.edu.cn,

Tel: 86-22-23509794, Fax: 86-22-23503510.

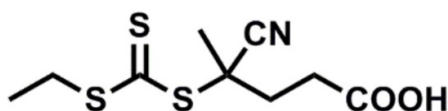

**Scheme S1.** The chemical structure of ECT.

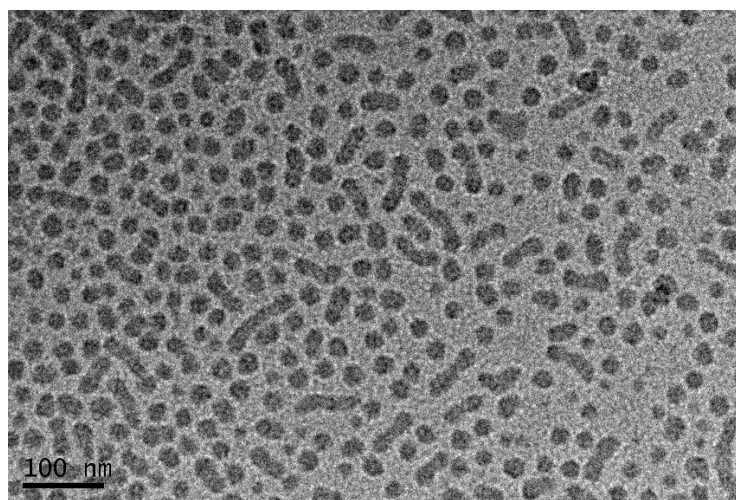

**Figure S1.** The TEM image of the seed-nanoparticles of PS<sub>135</sub>-*b*-PDMA<sub>80</sub>-TTC diblock copolymer dispersed in the ethanol/water/NIPAM (80/20/16.7 by weight) ternary mixture with polymer concentration at 4.9 wt%.

A: PS<sub>135</sub>-*b*-PDMA<sub>80</sub>-TTC seed-nanoparticles

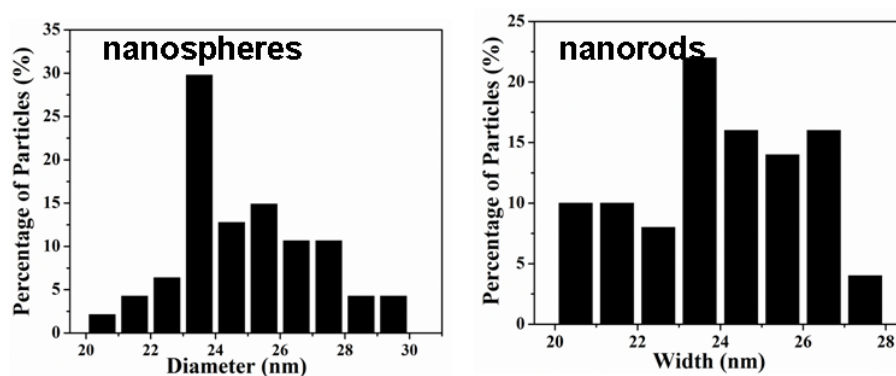

B: PS<sub>135</sub>-*b*-PDMA<sub>80</sub>-*b*-PNIPAM<sub>312</sub> nano-objects

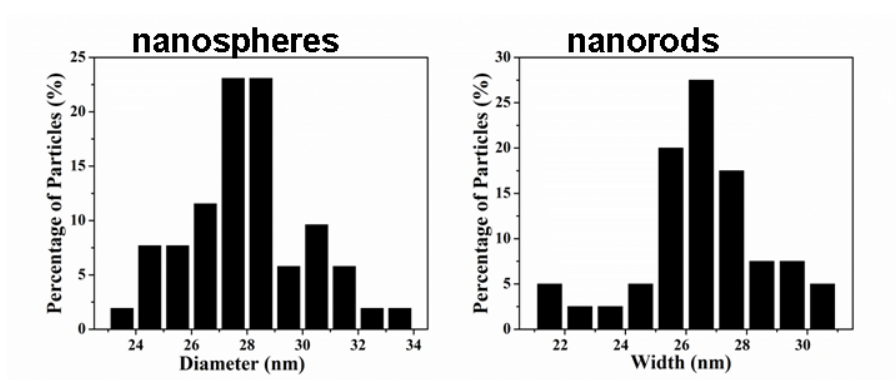

**Figure S2.** Size distribution of the PS<sub>135</sub>-*b*-PDMA<sub>80</sub>-TTC seed-nanoparticles (A) and the typical triblock terpolymer nano-objects of PS<sub>135</sub>-*b*-PDMA<sub>80</sub>-*b*-PNIPAM<sub>312</sub> (B).

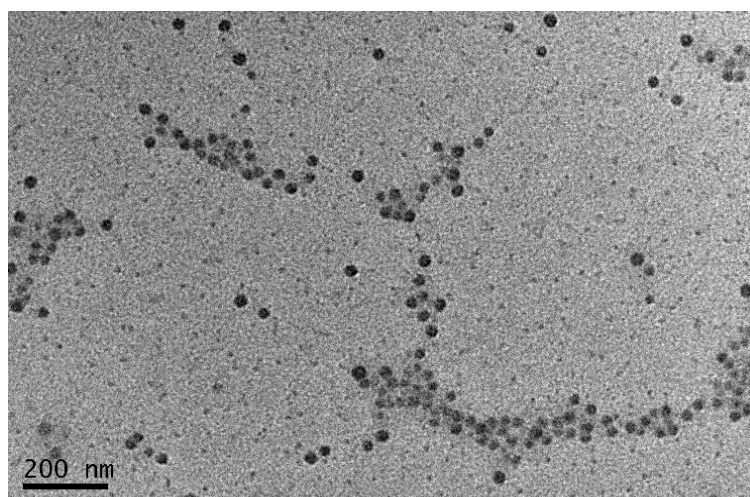

**Figure S3.** The TEM image of the PS<sub>135</sub>-*b*-PDMA<sub>80</sub>-*b*-PNIPAM<sub>368</sub> triblock terpolymer nanospheres prepared through the seeded RAFT polymerization at time of 4 h.

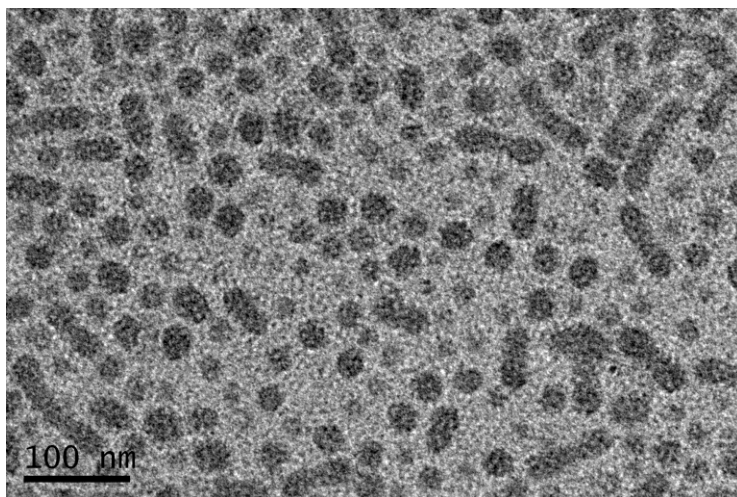

**Figure S4.** TEM image of PS<sub>135</sub>-*b*-PDMA<sub>80</sub>-*b*-PNIPAM<sub>76</sub> triblock terpolymer nano-objects in water at temperature of 50 °C.
